# Supplementary material for: Epigenetic Silencing of MicroRNA-126 Promotes Cell Growth in Marek’s Disease
Source: MDPI journal article supplement (doi:10.3390/microorganisms9061339), 2021-06-21
Supplement: s1 [file s1]

## Supplementary Materials

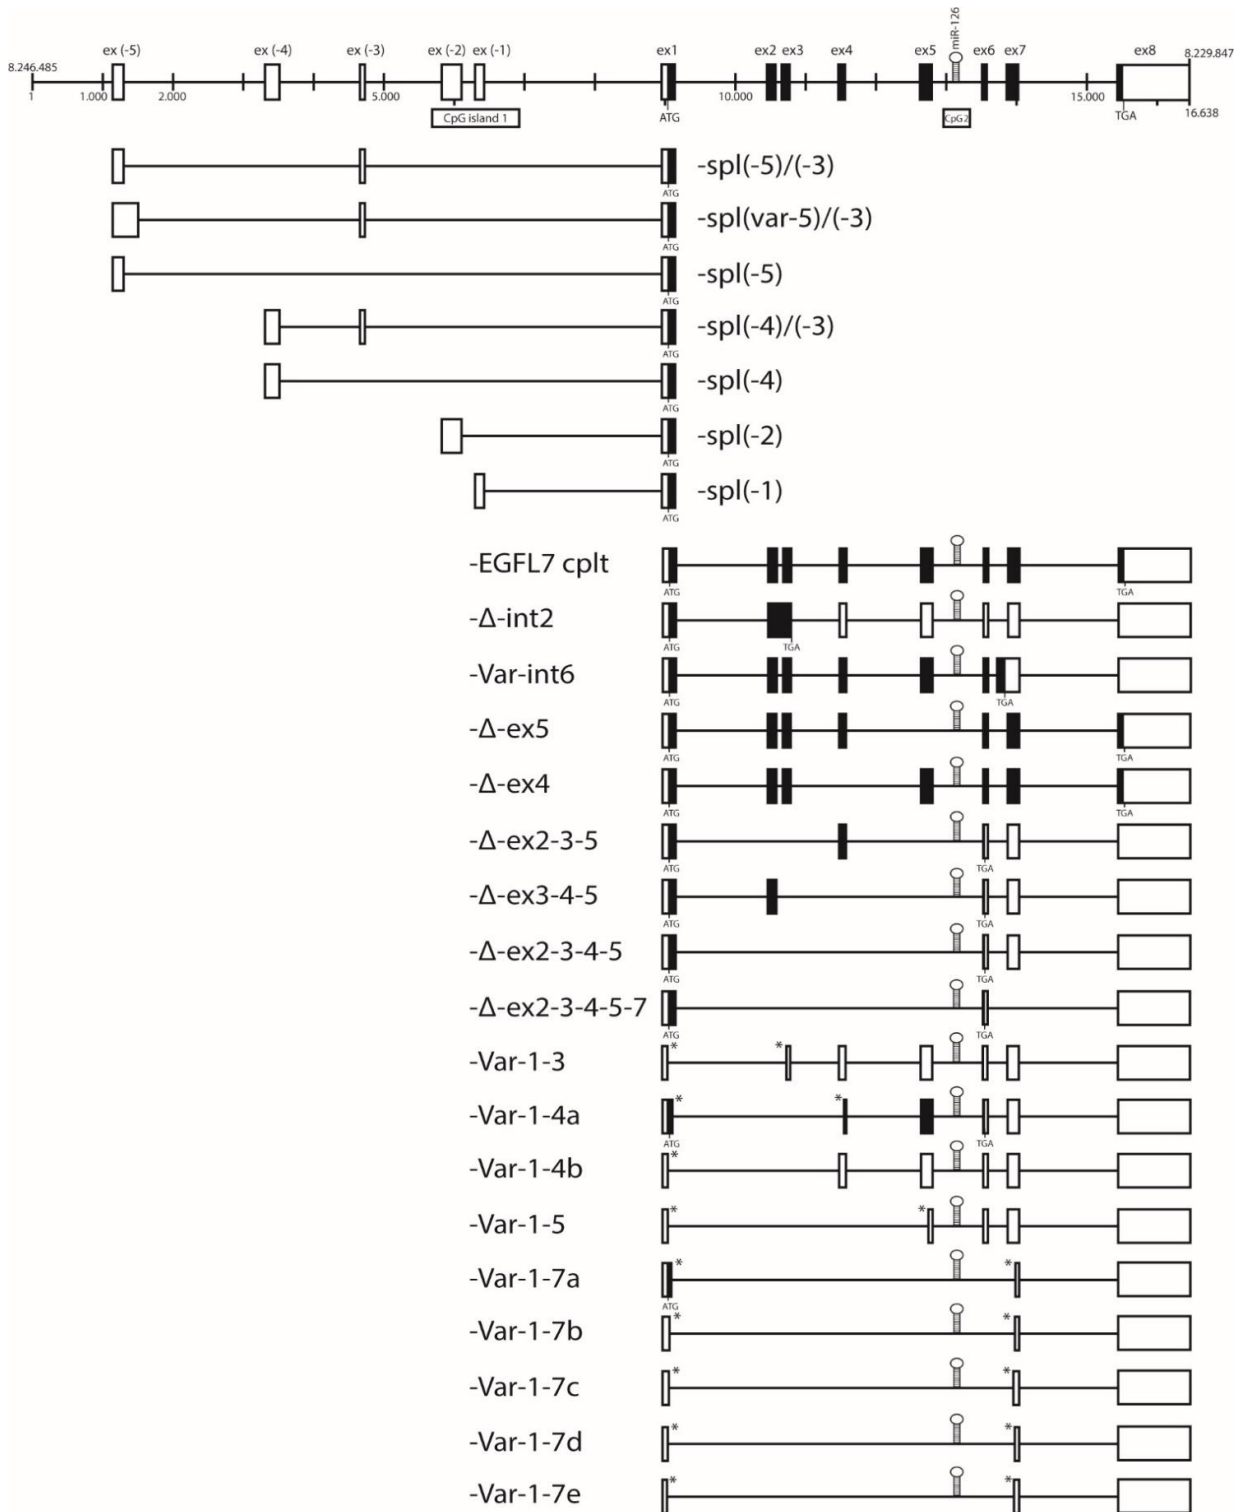

**Figure S1.** Schematic representation of all transcripts encoding the epidermal growth factor like-7 (*EGFL-7*) gene. The full-length *EGFL-7* gene is represented on top of the image. Gene structure and exon annotations were established from bioinformatics predictions available for *EGFL-7*. Alternative transcripts from exon -5 to exon 1 and alternative transcripts from exon 1 to exon 8 are shown. Non-coding exons are represented by white boxes. Coding exons are represented by black boxes. The black bars are introns. MiR-126 is represented by a stem-loop structure in the fifth intron. \* represents unconventional splice sites (alternative donor or acceptor).

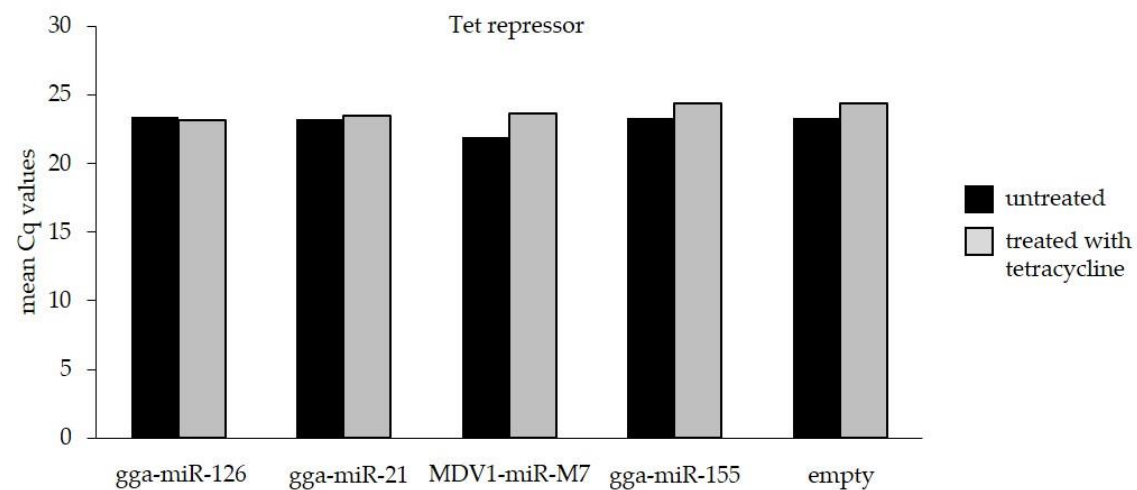

(a)

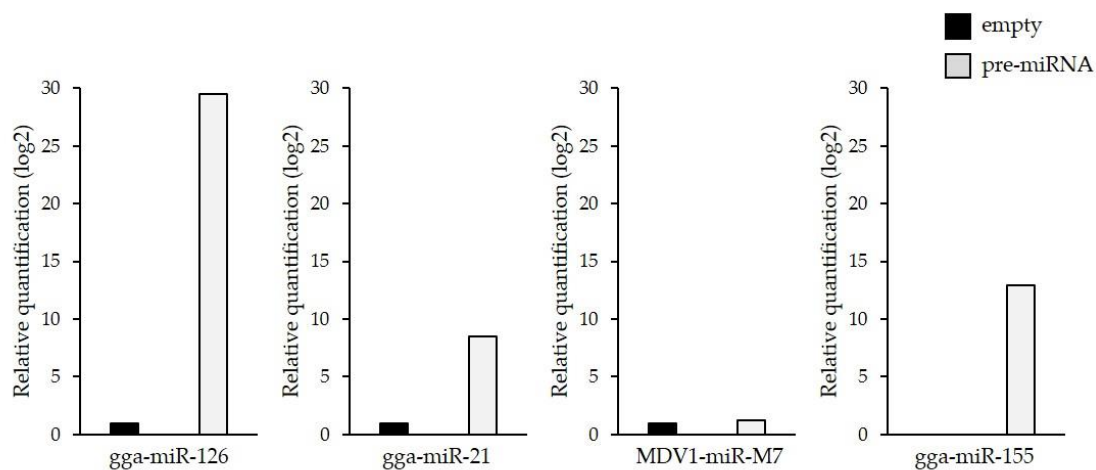

(b)

**Figure S2.** Quantification of the tet repressor and different micro-RNAs in the stable MSB-1 cell lines treated with tetracycline. **(a)** Quantification by qRT-PCR of the tet repressor (tetR) in treated (light grey) and untreated (black) stable cell lines. The X-axis represents the different cell lines containing the plasmid, allowing the overexpression of miR-126 and control miRNAs, as well as a plasmid without pre-miRNA sequence inside (empty). The y-axis represents the mean of a technical triplicate of raw Cq values. **(b)** Quantification by qRT-PCR of the expression level of the miRNAs within their respective cell lines 48 h after the induction of their expression by tetracycline treatment (light grey) relative to the expression of these miRNAs by the cells containing an empty plasmid without pre-miRNA (black).
